# Supplementary material for: Cognitive, Graphomotor, and Psychosocial Challenges in Pediatric Autoimmune Neuropsychiatric Disorders Associated With Streptococcal Infections (PANDAS)
Source: Atypon-hosted journal article supplement (doi:10.1176/appi.neuropsych.20030065), 2020-12-02
Supplement: appi.neuropsych.20030065.ds001.pdf [file appi.neuropsych.20030065.ds001.pdf]

**Table S1. Composition of Neuropsychological Variables by Domain^**

| <b>Cognitive</b>      | <b>Neuropsychological Measures Used in Composite Variables</b>                                                                                                     |
|-----------------------|--------------------------------------------------------------------------------------------------------------------------------------------------------------------|
| Inattention           | CPT-II: Omissions, Hit Response Time (RT) Block Change, Hit RT Standard Error (SE) Block Change, Hit RT Interstimulus Interval (ISI) Change, Hit RT SE ISI Change) |
| Inhibition            | Perseverations on DKEFS VF, WCST, CVLT-C, and CPT-II; Intrusions on CVLT-C, DKEFS CWI Inhibition, NEPSY-II Statue, NEPSY-II Inhibition                             |
| Processing Speed      | WISC-IV/V Processing Speed Index                                                                                                                                   |
| Switching             | Switching subtests on DKEFS CWI, VF, and TMT; NEPSY-II Inhibition Switching                                                                                        |
| Verbal Fluency        | COWA (FAS score), NEPSY-II Word Generation – Initial Letter and Category, DKEFS VF Letter and Category Fluency                                                     |
| Working Memory        | WISC-IV/V Working Memory Index                                                                                                                                     |
| <b>Motor</b>          |                                                                                                                                                                    |
| Graphomotor Precision | VMI-6                                                                                                                                                              |
| Dexterity             | Grooved Pegboard Test (dominant and nondominant)                                                                                                                   |
| <b>Academic</b>       |                                                                                                                                                                    |
| Word Decoding         | WIAT-3 Early Reading Skills, WIAT-3 Word Reading, WIAT-3 Pseudoword Decoding                                                                                       |
| Reading Fluency       | GORT-5 Oral Reading Fluency, TOWRE-1/2 Total Word Reading Efficiency                                                                                               |
| Spelling              | WIAT-3 Spelling                                                                                                                                                    |
| Writing               | WIAT-3 Sentence Building, WIAT-3 Essay                                                                                                                             |
| Writing Fluency       | WIAT-3 Alphabet Writing Fluency, WIAT-3 Essay Word Count                                                                                                           |
| Mathematics           | WIAT-3 Math Problem Solving, WIAT-3 Numerical Operations                                                                                                           |
| Math Fluency          | WIAT-3 Math Fluency: Addition, Subtraction, and Multiplication                                                                                                     |

^Abbreviations: NEPSY-II (A Developmental Neuropsychological Assessment, 2<sup>nd</sup> Edition); CVLT-C (California Verbal Learning Test, Children's Edition); CPT-II (Conners' Continuous Performance Test - Second Edition); COWA (Controlled Oral Word Association Test); DKEFS (Delis-Kaplan Executive Function System); TMT (Trail Making Test), CWI (Color Word Interference Test), VF (Verbal Fluency); VMI-6 (Beery-Buktenica Developmental Test of Visual Motor Integration – Sixth Edition); GORT-5 (Gray Oral Reading Test – Fifth Edition); TOWRE and TOWRE-2 (Test of Oral Word Reading Efficiency, 1<sup>st</sup> and 2<sup>nd</sup> Editions); WISC-IV and WISC-V (Wechsler Intelligence Scale for Children, 4<sup>th</sup> and 5<sup>th</sup> Editions); WIAT-3 (Wechsler Individual Achievement Test – Third Edition); WCST (Wisconsin Card Sorting Test)
